# Supplementary material
Source: Springer Nature journal article supplement (https://www.springermedizin.de/resource/supplementary/12882_2012_366_MOESM2_ESM.pdf/9453486)
Supplement: MOESM2 [file 9453486]

**Supplementary Table S2. List of medications included in estimation of healthcare resource utilisation related to secondary hyperparathyroidism, cardiovascular disease, and diabetes.**

| <b>Drug Class</b>                             | <b>Generic Name</b>                                                                                                                                                                                                                                                                                |
|-----------------------------------------------|----------------------------------------------------------------------------------------------------------------------------------------------------------------------------------------------------------------------------------------------------------------------------------------------------|
| <b>Secondary hyperparathyroidism</b>          |                                                                                                                                                                                                                                                                                                    |
| Phosphate binder                              | Aluminium hydroxide<br>Aluminium phosphate<br>Calcium acetate<br>Calcium acetate/magnesium carbonate<br>Calcium carbonate<br>Calcium glubionate<br>Calcium gluconate<br>Calcium phosphate<br>Calcium (different salts in combination)<br>Lanthanum carbonate<br>Polystyrene sulfonate<br>Sevelamer |
| Oral vitamin D sterol                         | Alfacalcidol<br>Calcifediol<br>Calcitriol<br>Calecalciferol<br>Doxercalciferol<br>Ergocalciferol<br>Paricalcitol<br>Cinacalcet                                                                                                                                                                     |
| Calcimimetic                                  |                                                                                                                                                                                                                                                                                                    |
| <b>Cardiovascular disease</b>                 |                                                                                                                                                                                                                                                                                                    |
| Anti-aggregant                                |                                                                                                                                                                                                                                                                                                    |
| Cyclooxygenase inhibitor                      | Acetylsalicylic acid<br>Acetylsalicylic acid, combinations with psycholeptics<br>Carbasalate calcium                                                                                                                                                                                               |
| ADP-receptor inhibitor                        | Clopidogrel<br>Prasugrel<br>Ticlopidine                                                                                                                                                                                                                                                            |
| Phosphodiesterase inhibitor                   | Cilostazol                                                                                                                                                                                                                                                                                         |
| Glycoprotein IIB/IIIA inhibitor (IV use only) | Abciximab<br>Eptifibatide<br>Fondaparinux<br>Tirofiban<br>Defibrotide                                                                                                                                                                                                                              |
| Adenosine reuptake inhibitor                  | Dipyridamole                                                                                                                                                                                                                                                                                       |
| Statin                                        | Atorvastatin<br>Fluvastatin<br>Lovastatin<br>Mevastatin<br>Pitavastatin<br>Pravastatin<br>Rosuvastatin<br>Simvastatin<br>Atorvastatin + amlodipine besylate<br>Lovastatin + niacin extended-release<br>Simvastatin + ezetimibe<br>Simvastatin + niacin extended-release                            |
| Peripheral vasodilator                        | Buflomedil<br>Ifenprodil<br>Naftidrofuryl                                                                                                                                                                                                                                                          |

| Drug Class                                     | Generic Name                                   |                                        |
|------------------------------------------------|------------------------------------------------|----------------------------------------|
| Fibrate                                        | Vincamine                                      |                                        |
|                                                | Bezafibrate                                    |                                        |
|                                                | Ciprofibrate                                   |                                        |
|                                                | Clofibrate                                     |                                        |
|                                                | Gemfibrozil                                    |                                        |
|                                                | Fenofibrate                                    |                                        |
| Antihypertensive<br>Diuretic                   | Loop diuretic                                  | Bumetanide                             |
|                                                |                                                | Ethacrynic acid                        |
|                                                |                                                | Furosemide                             |
|                                                |                                                | Piretanide                             |
|                                                |                                                | Torsemide                              |
|                                                |                                                | Bendroflumethiazide                    |
|                                                | Thiazide diuretic                              | Epitizide                              |
|                                                |                                                | Hydrochlorothiazide and chlorothiazide |
|                                                |                                                | Chlortalidone                          |
|                                                | Thiazide-like diuretic                         | Indapamide                             |
|                                                |                                                | Metolazone                             |
|                                                |                                                | Xipamide                               |
|                                                |                                                | Amiloride                              |
|                                                | Potassium-sparing diuretic                     | Potassium canrenoate                   |
|                                                |                                                | Spironolactone                         |
|                                                |                                                | Triamterene                            |
|                                                |                                                |                                        |
|                                                | Adrenergic receptor antagonist<br>Beta blocker | Acebutolol                             |
| Atenolol                                       |                                                |                                        |
| Betaxolol                                      |                                                |                                        |
| Bisoprolol                                     |                                                |                                        |
| Carteolol                                      |                                                |                                        |
| Celiprolol                                     |                                                |                                        |
| Metoprolol                                     |                                                |                                        |
| Nadolol                                        |                                                |                                        |
| Nebivolol                                      |                                                |                                        |
| Oxprenolol                                     |                                                |                                        |
| Pindolol                                       |                                                |                                        |
| Propranolol                                    |                                                |                                        |
| Solatol                                        |                                                |                                        |
| Tertatolol                                     |                                                |                                        |
| Timolol                                        |                                                |                                        |
| Alpha blocker                                  |                                                | Doxazosin                              |
|                                                |                                                | Indoramin                              |
|                                                |                                                | Phenoxybenzamine                       |
|                                                |                                                | Phentolamine                           |
|                                                |                                                | Prazosin                               |
|                                                |                                                | Terazosin                              |
| Mixed alpha + beta blocker                     | Tolazoline                                     |                                        |
|                                                | Uradipil                                       |                                        |
|                                                | Bucindolol                                     |                                        |
|                                                | Carvedilol                                     |                                        |
| Adrenergic receptor agonist<br>Alpha-2 agonist | Labetalol                                      |                                        |
|                                                | Clonidine                                      |                                        |
|                                                | Guanfacine                                     |                                        |

| Drug Class                                 | Generic Name                                                                                                                                                                                |
|--------------------------------------------|---------------------------------------------------------------------------------------------------------------------------------------------------------------------------------------------|
| Calcium channel blocker<br>Dihydropyridine | Methyldopa<br>Moxonidine<br>Rilmenidine                                                                                                                                                     |
| Non-dihydropyridine                        | Amlodipine<br>Cyclandelate<br>Felodipine<br>Isradipine<br>Lacidipine<br>Lercanidipine<br>Manidipine<br>Nicardipine<br>Nifedipine<br>Nimodipine<br>Nitrendipine<br>Diltiazem                 |
| ACE inhibitor                              | Verapamil<br>Benazepril<br>Captopril<br>Cilazapril<br>Enalapril<br>Fosinopril<br>Imadapril<br>Lisinopril<br>Moexipril<br>Perindopril<br>Quinapril<br>Ramipril<br>Trandolapril<br>Zofenopril |
| Angiotensin II receptor antagonist         | Candesartan<br>Eprosartan<br>Irbesartan<br>Losartan<br>Olmesartan medoxomil<br>Telmisartan<br>Valsartan                                                                                     |
| Aldosterone antagonist                     | Eplerenone<br>Spironolactone                                                                                                                                                                |
| Oral anticoagulant                         | Acenocoumarol<br>Phenindione<br>Tiocloamarol<br>Warfarin                                                                                                                                    |
| <b>Diabetes</b>                            |                                                                                                                                                                                             |
| Insulin<br>Regular insulin<br>Rapid-acting | Regular<br>Insulin (human)<br>Insulin (pork)<br>Insulin aspart<br>Insulin glulisine<br>Insulin lispro                                                                                       |
| Intermediate-acting                        | Insulin (pork)<br>NPH<br>Combinations                                                                                                                                                       |

| <b>Drug Class</b>            | <b>Generic Name</b>                                                                                                                                                                        |
|------------------------------|--------------------------------------------------------------------------------------------------------------------------------------------------------------------------------------------|
| Long-acting                  | Insulin (beef)<br>Insulin (pork)<br>Insulin detemir<br>Insulin glargine<br>Combinations                                                                                                    |
| Mixtures                     | 50% lispro protamine, 50% insulin lispro<br>70% aspart protamine, 30% aspart<br>70% NPH, 30% regular<br>70% NPH, 30% regular<br>75% lispro protamine, 25% insulin lispro<br>Insulin (pork) |
| Sulfonylureas                |                                                                                                                                                                                            |
| First-generation agents      | Acetohexamide<br>Carbutamide<br>Chlorpropamide<br>Tolazamide<br>Tolbutamide                                                                                                                |
| Second-generation agents     | Glibonuride<br>Gliclazide<br>Glimepiride<br>Glipizide<br>Glyburide                                                                                                                         |
| Meglitinides                 | Nateglinide<br>Repaglinide                                                                                                                                                                 |
| Biguanides                   | Metformin                                                                                                                                                                                  |
| Thiazolidinediones           | Pioglitazone<br>Rosiglitazone                                                                                                                                                              |
| Alpha-glucosidase inhibitors | Acarbose<br>Miglitol                                                                                                                                                                       |
| GLP analogues                | Benfluorex<br>Exenatide<br>Liraglutide                                                                                                                                                     |
| DPP-4 inhibitors             | Sitagliptin<br>Vildagliptin                                                                                                                                                                |

Abbreviations: ACE, angiotensin-converting enzyme; ADP, adenosine diphosphate; DPP, dipeptidyl peptidase; GLP, glucagon-like peptide; IV, intravenous; NPH, neutral protamine Hagedorn
